# Propofol Infusion for Maintenance of Anesthesia in Morbidly Obese Patients Receiving Nitrous Oxide

## A Clinical and Pharmacokinetic Study

Frédérique Servin, M.D.,\* Robert Farinotti, Ph.D.,† Jean-Pierre Haberer, M.D.,‡ Jean-Marie Desmonts, M.D.§

**Background:** The pharmacokinetic and pharmacodynamic properties of propofol indicate that this may be an appropriate agent for induction and maintenance of anesthesia in obese patients. This study was designed to assess the rates of recovery and the pharmacokinetics of propofol infusions in morbidly obese patients.

**Methods:** Anesthesia was induced and maintained using a stepwise infusion regimen of propofol in eight morbidly obese patients. The patients' lungs were ventilated with nitrous oxide:oxygen (66:34%). Pharmacokinetic parameters were calculated from iterative blood sampling during the propofol infusion and during 8 h after its completion.

**Results:** Results were compared with those from a concurrent study of propofol pharmacokinetics in nonobese adults. The initial volume of distribution of propofol was not modified in obese patients. Total body clearance increase was correlated to body weight ( $R = 0.76$ ,  $25.4 \pm 6.5 \text{ ml} \cdot \text{kg}^{-1} \cdot \text{min}^{-1}$ , mean  $\pm$  SD). Volume of distribution at steady state was also correlated to body weight ( $R = 0.61$ ,  $1.63 \pm 0.54 \text{ l} \cdot \text{kg}^{-1}$ , mean  $\pm$  SD). Propofol concentration at the time of eye opening in response to verbal command was  $0.94 \pm 0.26 \text{ mg} \cdot \text{l}^{-1}$ .

**Conclusions:** Results from this study confirm the absence of propofol accumulation in morbidly obese patients when the current dosing scheme is used. Dosing schemes expressed in  $\text{mg} \cdot \text{kg}^{-1}$  are the same as those in normal patients. (Key words:

Anesthetics, intravenous: propofol. Pharmacokinetics, obesity.)

THE choice of anesthetic for maintenance of general anesthesia in morbidly obese patients remains controversial. Rapid recovery is desirable to ensure early efficient coughing and to minimize postoperative respiratory complications, which frequently occur.<sup>1</sup> The use of propofol in morbidly obese patients has been reported in a few clinical studies.<sup>2-4</sup> No delayed recovery was recorded. However, no pharmacokinetic data regarding propofol infusions are currently available to confirm the absence of propofol accumulation in this population. This study was designed to simultaneously investigate the quality of early recovery and pharmacokinetics of propofol infusions used for the maintenance of general anesthesia in morbidly obese patients. The parameters calculated in obese patients were compared with those calculated in a group of healthy patients concurrently studied in our institution.<sup>5</sup>

## Materials and Methods

Pharmacokinetics of propofol were studied in eight morbidly obese patients aged  $47.1 \pm 15.6 \text{ yr}$  (mean  $\pm$  SD, range 25-66 yr) and weighing  $115.5 \pm 20.8 \text{ kg}$  (mean  $\pm$  SD, range 97-160 kg). All patients were undergoing nonhemorrhagic elective surgical procedures requiring general anesthesia for a minimum period of 2 h and gave informed consent to participate in the study. Patients with evidence of renal, hepatic, or cardiac dysfunction were excluded from the study. All patients received diazepam 10 mg and atropine 1 mg orally 1 h before anesthesia. An intravenous cannula was inserted in a forearm vein for injection of propofol. Following infiltration with lidocaine, a cannula was inserted in the contralateral radial artery for monitoring arterial pressure and for collection of blood samples for pharmacokinetic analysis.

\* Staff Anesthesiologist, Département d'Anesthésie-Réanimation, Chu Bichat-Claude Bernard.

† Professor of Clinical Pharmacy, Laboratoire de Toxicologie, Chu Bichat-Claude Bernard.

‡ Professor of Anesthesia, Département d'Anesthésie-Réanimation, Hopitaux de Brabois.

§ Professor of Anesthesia, Département d'Anesthésie-Réanimation, CHU Bichat-Claude Bernard.

Received from the Département d'Anesthésie-Réanimation and Laboratoire de Toxicologie, CHU Bichat-Claude Bernard, Paris, France; and the Département d'Anesthésie-Réanimation, Hopitaux de Brabois, France. Accepted for publication December 9, 1992. Presented in part at the Annual Meeting of the American Society of Anesthesiologists, San Francisco, California, October 8-12, 1988.

Address reprint requests to Dr. Servin: Département d'Anesthésie-Réanimation, CHU Bichat-Claude Bernard, 46, rue Henri Huchard, 75878 Paris, Cedex 18, France.

Anesthesia was induced and maintained using a step-wise infusion regimen of propofol  $21 \text{ mg} \cdot \text{kg}^{-1} \cdot \text{h}^{-1}$  for 5 min,  $12 \text{ mg} \cdot \text{kg}^{-1} \cdot \text{h}^{-1}$  for 10 min, and  $6 \text{ mg} \cdot \text{kg}^{-1} \cdot \text{h}^{-1}$  for the remainder of the procedure. The weight used for the calculation of the infusion rate was established using an empirical formula (corrected weight = ideal weight +  $[0.4 \times \text{excess weight}]$ ) because, in these patients, the dosages calculated on an actual weight basis were so high that the absence of deleterious hemodynamic effects could not be assured. Following the onset of unconsciousness, succinylcholine was given to facilitate tracheal intubation and vecuronium to maintain muscle relaxation. Small incremental doses of fentanyl ( $50 \mu\text{g}$ ) were given intravenously as required throughout the procedure. The patients' lungs were ventilated to normocapnia with a mixture of 66% nitrous oxide in oxygen. At the end of the procedure, the propofol infusion and nitrous oxide administration were simultaneously stopped. The time from the beginning of infusion to the loss of consciousness, the time to opening eyes on verbal command after stopping the infusion, the duration of the infusion, and the total amount of propofol infused were recorded.

For pharmacokinetic analysis, 2.5-ml blood samples were collected before infusion of propofol and at 2, 5, 10, 15, 20, 25, 30, 45, 60, 75, 90, 105, and 120 min thereafter. For infusions continuing beyond 120 min, additional samples were obtained every 15 min. A sample was collected as the infusion was stopped, and further 5-ml samples were collected 2, 4, 6, 8, 10, 15, 20, 30, 45, 60, 75, 90, 120, 150, 180, 240, 300, 360, 420, and 480 min after the end of the infusion. An additional sample was drawn when the patient opened his or her eyes on verbal command. After thorough mixing, the samples were cooled immediately to  $4^\circ \text{C}$  and stored at that temperature until subsequent analysis. Whole blood concentrations of propofol were measured by high-pressure liquid chromatography<sup>6</sup> with a coefficient of variation of 8% and a lower limit of detection of 4 ng/ml.

The blood concentration curves obtained for individual patients were fitted to the sum of exponential functions derived from Colburn<sup>7</sup> and interpreted as three-compartment open mammillary models. Pharmacokinetic modeling was performed using SIPHAR program<sup>†</sup> for the fitting of the curves, with a weighing function

of  $1/y^2$ . The quality of the fit of the three exponential models was assessed by the presence of a random scatter of the data around a calculated value,<sup>8</sup> and by visual assessment of the residuals of the observed values from the fitted curve.

The following parameters were derived from the fitted model:<sup>9</sup> distribution and elimination half lives ( $T_{1/2\alpha}$ ,  $T_{1/2\beta}$ ,  $T_{1/2\gamma}$ ), volume of the central compartment ( $V$ ); total body clearance ( $\text{Cl}_T$ ); distribution clearance ( $\Sigma \text{Cl}_i = V \cdot k_{12} + V \cdot k_{13}$ ); and volume of distribution at steady state ( $V_{ss}$ ).

Propofol pharmacokinetics in ten healthy patients within the normal weight range,<sup>10</sup> aged  $42.0 \pm 11.7$  yr (24–56) and weighing  $65.6 \pm 14.9$  kg (50–96), were determined in a concurrent study in our institution.<sup>5</sup> The study design was identical as far as clinical protocol data recording and blood propofol analysis were concerned. In that concurrent study, pharmacokinetic modelling had been performed using the ELSFIT program<sup>11</sup> for the fitting of the curves. For the purpose of the current study, the raw data of the control patients underwent a new pharmacokinetic analysis using the SIPHAR program for the fitting of the curves, with a weighing function of  $1/y^2$ , the same as in obese patients.

Statistical analysis was performed by Wilcoxon Rank Sum test for between-group comparisons of pharmacokinetic data and unpaired  $t$  test for between-group comparisons of measured data; ANOVA for repeated measures was used to compare the measured blood propofol concentrations. A  $P$  value  $\leq 0.05$  was considered significant. Values are expressed as mean  $\pm$  SD.

## Results

Table 1 shows the clinical characteristics of the patients and displays a significant difference in weight between the two groups. The percentage of female patients was greater in the obese group. Infusion data in both groups of patients are displayed in table 2. Induction was achieved in 3–4 min in both groups. Because of the dosage scheme used, the amount of propofol infused (mg/kg) was significantly less in the obese group and led to a significantly shorter time to opening eyes on verbal command at the end of the infusion. The propofol concentration when opening eyes was similar in both groups. Changes in mean blood concentrations of propofol with time, both during and after the infusion, followed a similar pattern in both groups of patients (figs. 1, 2).

<sup>†</sup> Gomeni R: PHARM—an interactive graphic program for individual and population pharmacokinetic parameter estimation. *Comput Biol Med* 14: 25–34, 1984.

## PROPOFOL PHARMACOKINETICS IN OBESE PATIENTS

Table 1. Clinical Characteristics of the Patients

| Patients        | Surgical Procedure            | Age (yr)        | Sex   | Weight (kg)      | Ideal Body Weight (kg) | Plasma Albumin Concentration (g/L) | Plasma Creatinine Concentration ( $\mu$ M) | Hemoglobin Concentration (g/100 ml) |
|-----------------|-------------------------------|-----------------|-------|------------------|------------------------|------------------------------------|--------------------------------------------|-------------------------------------|
| <b>Obese</b>    |                               |                 |       |                  |                        |                                    |                                            |                                     |
| 1               | Hip replacement               | 55              | F     | 108              | 55.5                   | 40                                 | 81                                         | 15                                  |
| 2               | Cholecystectomy               | 37              | F     | 160              | 62.0                   | 37                                 | 90                                         | 14                                  |
| 3               | Cholecystectomy               | 30              | F     | 97               | 52.5                   | 38                                 | 93                                         | 13.5                                |
| 4               | Cholecystectomy               | 66              | M     | 130              | 72.5                   | 38                                 | 100                                        | 16.2                                |
| 5               | Wound dehiscence              | 66              | F     | 105              | 55.0                   | 37                                 | 91                                         | 13.4                                |
| 6               | Wound dehiscence              | 53              | M     | 107              | 62.7                   | 38                                 | 119                                        | 13.7                                |
| 7               | Lipoma resection              | 25              | F     | 100              | 55.0                   | 47                                 | 57                                         | 14                                  |
| 8               | Wound dehiscence              | 45              | F     | 117              | 53.5                   | 44                                 | 71                                         | 14.3                                |
| Mean $\pm$ SD   |                               | 47.1 $\pm$ 15.6 | 6F/2M | 115.5 $\pm$ 20.8 | 58.6 $\pm$ 6.8         | 39.9 $\pm$ 3.7                     | 87.8 $\pm$ 18.7                            | 14.3 $\pm$ 0.93                     |
| <b>Control*</b> |                               |                 |       |                  |                        |                                    |                                            |                                     |
| 1               | Femoral pseudarthrosis repair | 24              | M     | 60               | 66.5                   | 40                                 | 75                                         | 11.9                                |
| 2               | Femoral pseudarthrosis repair | 34              | M     | 55               | 63.5                   | 42                                 | 74                                         | 14.1                                |
| 3               | Pulmonary resection           | 42              | M     | 54               | 65.0                   | 33                                 | 93                                         | 16.3                                |
| 4               | Pleurectomy                   | 54              | F     | 55               | 56.5                   | 40                                 | 65                                         | 12.7                                |
| 5               | Colectomy                     | 55              | M     | 70               | 66.5                   | 46                                 | 107                                        | 16.6                                |
| 6               | Hysterectomy                  | 52              | F     | 85               | 61.0                   | 38                                 | 57                                         | 14.9                                |
| 7               | Wound dehiscence              | 56              | M     | 70               | 65.0                   | 36                                 | 48                                         | 13.8                                |
| 8               | Selective vagotomy            | 33              | M     | 61               | 66.5                   | 31                                 | 81                                         | 14.4                                |
| 9               | Cholecystectomy               | 39              | M     | 96               | 75.5                   | 38                                 | 85                                         | 15.2                                |
| 10              | Ileal resection               | 30              | F     | 50               | 55.0                   | 36                                 | 55                                         | 12                                  |
| Mean $\pm$ SD   |                               | 41.9 $\pm$ 11.7 | 3F/7M | 65.6 $\pm$ 14.9† | 64.1 $\pm$ 5.8         | 38.0 $\pm$ 4.3                     | 74.0 $\pm$ 18.3                            | 14.2 $\pm$ 1.6                      |

\* Patients included in the concurrent study.<sup>5</sup>†  $P \leq 0.001$ .

Pharmacokinetic parameters are displayed in tables 3, 4, and 5. The evolution of blood propofol concentrations over time could be best described by a three-compartment open mammillary model in nine control patients and in all obese patients, whereas the fit was better with a two-compartment model in one control patient. The volume of the central compartment was similar in both groups. It could not be defined accurately in one patient of the obese group (patient 2). Total body clearance of propofol was significantly correlated to body weight (fig. 3), and, as a result, clearance normalized by body weight was not statistically different in obese and control patients. The same phenomenon was observed with  $V_{ss}$  (fig. 4). By contrast,  $\Sigma Cl_i$  was not correlated to body weight (fig. 5), and its value was not statistically significantly different in control and obese patients. The amount of extrapolated AUC was  $3.16 \pm 1.51\%$  in the obese group and  $3.16 \pm 1.13\%$  in the control group. The order of magnitude in the elimination half lives did not differ between the two groups. The coefficients A, B, and C reported in table 5 represent the amount that each half life con-

tributes to the decrease in propofol blood concentration, and can be expressed as a percent of the sum of all coefficients,<sup>12</sup> thus figuring the relative importance of the different half lives in the decrease of blood propofol concentration. Those coefficients are displayed in table 6.

## Discussion

Few data are currently available concerning propofol dosages for induction and maintenance of general anesthesia in morbidly obese patients. Kirby *et al.*<sup>2</sup> advised the use of reduced body-related dosages in these cases. Redfern *et al.*<sup>13</sup> found that the total propofol dose required to induce anesthesia did not correlate with the weight of the patient. Considering the moderately increased steady-state concentration in heavier patients during propofol constant rate infusions at 3, 6, and 9  $\text{mg} \cdot \text{kg}^{-1} \cdot \text{h}^{-1}$ , Gepts *et al.*<sup>14</sup> suggested that a combination of a fixed dose and a body weight-related dose may be preferable. On the other hand, propofol has marked hemodynamic effects and an excessive dos-

Table 2. Infusion Details in Obese and Control Patients

| Patients       | Loss of Consciousness (min) | Duration of Infusion (min) | Propofol Infused (mg/kg) | Propofol Concentration When Opening Eyes (mg/L) | Time to Opening Eyes (min) | Time to Orientation (min) |
|----------------|-----------------------------|----------------------------|--------------------------|-------------------------------------------------|----------------------------|---------------------------|
| <b>Obese</b>   |                             |                            |                          |                                                 |                            |                           |
| 1              | 1.5                         | 156                        | 15.3                     | 0.745                                           | 20                         | 48                        |
| 2              | 5                           | 120                        | 9.4                      | 0.604                                           | 10                         | 12                        |
| 3              | 3.25                        | 165                        | 13.9                     | 0.733                                           | 8                          | 15                        |
| 4              | 3                           | 140                        | 12.5                     | 1.200                                           | 9                          | 15                        |
| 5              | 2                           | 250                        | 23.2                     | 0.848                                           | 19                         | 40                        |
| 6              | 6                           | 183                        | 16.5                     | 1.069                                           | 2                          | 6                         |
| 7              | 5                           | 55                         | 6.4                      | 0.964                                           | 5                          | 7                         |
| 8              | 2                           | 150                        | 13                       | 1.380                                           | 10                         | 20                        |
| Mean $\pm$ SD  | 3.8 $\pm$ 1.7               | 153.4 $\pm$ 55.2           | 13.8 $\pm$ 5.0           | 0.943 $\pm$ 0.262                               | 10.38 $\pm$ 6.26           | 20.38 $\pm$ 15.41         |
| <b>Control</b> |                             |                            |                          |                                                 |                            |                           |
| 1              | 2.5                         | 142                        | 16.5                     | 0.907                                           | 24                         | 28                        |
| 2              | 4.5                         | 226                        | 24.9                     | 1.106                                           | 16                         | 19                        |
| 3              | 3                           | 170                        | 19.3                     | 0.696                                           | 13                         | 25                        |
| 4              | 2                           | 296                        | 31.8                     | 0.903                                           | 18                         | 36                        |
| 5              | 4                           | 287                        | 31.0                     | 1.134                                           | 25                         | 40                        |
| 6              | 3                           | 173                        | 19.6                     | 1.360                                           | 11                         | 18                        |
| 7              | 4                           | 151                        | 15.7                     | 1.229                                           | 25                         | 30                        |
| 8              | 3                           | 133                        | 15.6                     | 0.792                                           | 10                         | 30                        |
| 9              | 3                           | 162                        | 18.5                     | 1.979                                           | 20                         | 38                        |
| 10             | 3.5                         | 208                        | 23.1                     | 1.555                                           | 22                         | 43                        |
| Mean $\pm$ SD  | 3.3 $\pm$ 0.8               | 194.8 $\pm$ 58.3           | 21.6 $\pm$ 6.0           | 1.166 $\pm$ 0.388                               | 18.4 $\pm$ 5.7             | 30.7 $\pm$ 8.6            |
| P              | NS                          | NS                         | $\leq 0.02$              | NS                                              | $\leq 0.02$                | NS                        |

age for induction might lead to severe cardiovascular depression in those patients who are often hemodynamically unstable. These are the reasons why, in this study, obese patients received comparatively less propofol per kg of body weight than lean patients in the concurrent study.<sup>5</sup> This might explain why the time to opening eyes on verbal command was significantly less in the obese group, although propofol blood concentrations when opening eyes were similar in the two groups. The differences in the dosage used in the two groups could make questionable the comparison of the pharmacokinetic data between them. However, Gepts *et al.* showed that propofol pharmacokinetics were linear in the usual therapeutic range.<sup>14</sup> This allows the comparison of calculated pharmacokinetic parameters in obese or lean patients despite different dosages. Propofol elimination half life is known to be dependent on the sampling time.<sup>15,16</sup> Thus, when the sampling period exceeds 42 h, apparent elimination half life and volume of distribution are much greater than those previously reported in the literature. In addition, systemic blood clearance is within the range of usually accepted values of hepatic blood flow.<sup>15</sup> The relatively short sampling time after the end of infusion in our

study (8 h) could lead to an overestimation of clearance. Nevertheless, the last elimination slopes in our studies were not different in obese or in lean patients, and nothing suggests that a fourth slope might be steeper in lean patients, leading to differences in elimination half lives when compared to those observed in the obese patients. Similarly, after such infusion schemes, the amount of extrapolated area is comparatively low and reduces the imprecision on the clearance values. Thus, even if some inaccuracy regarding the actual value of elimination half lives in obese patients may not be eliminated, the influence of this phenomenon on the estimation of clearance remains marginal, and its clinical implication appears minor. However, if elimination half life is an important parameter to define the pharmacokinetic model and to extrapolate the area under the concentration curve to infinity, it is of little clinical interest in estimating the recovery time when using a drug such as propofol, when the first "distribution" half lives account for more than 99% of blood concentration decrease.<sup>12</sup> This sustained influence of distribution processes in governing propofol disposition was clearly demonstrated by Hughes *et al.*,<sup>17</sup> who emphasized the difference between the

## PROPOFOL PHARMACOKINETICS IN OBESE PATIENTS

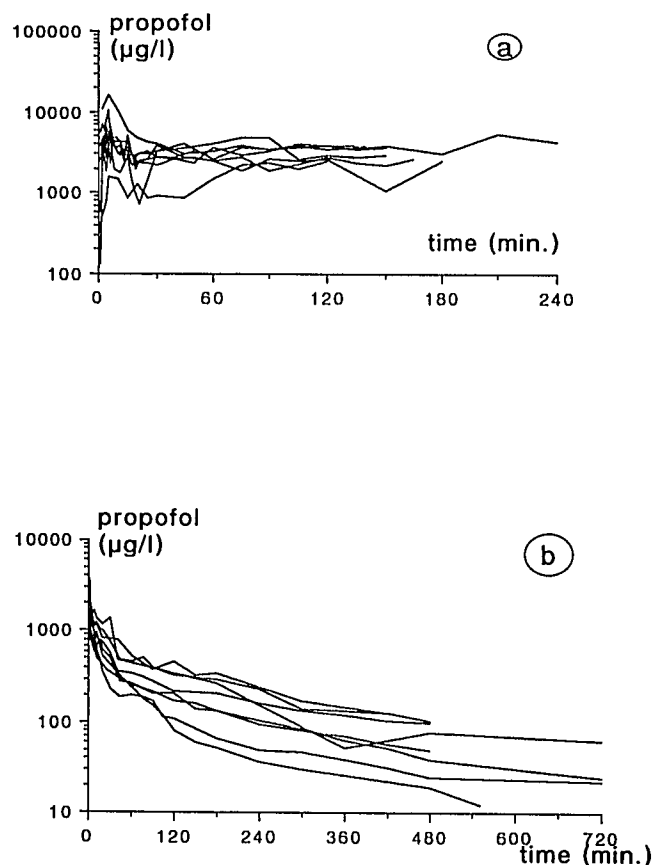

Fig. 1. Individual propofol blood concentration *versus* time data for each subject during the infusion (a) and after its discontinuation (b) in obese patients.

elimination half life of propofol (order of magnitude 250 min) and the "context sensitive half time" (time required for the central compartment drug concentration at the end of infusion to decrease by 50%) (order of magnitude 10–30 min).

Alterations of propofol disposition in obese patients could be related to several changes, including alterations of the propofol distribution, and of its metabolism in obese patients.

The distribution volume changes related to obesity depend on numerous factors, one of them being the increase of adipose mass. In obese patients, changes in distribution volume correlate with the lipophilicity of the agent.<sup>18</sup> Propofol is highly lipophilic, with an octanol:buffer partition ratio of 15 (Phosphate buffer  $10^{-2}$  M at pH 7.4, measured in our laboratory), similar to that of alprazolam, which is 18.<sup>19</sup> This lipophilicity index is lower than that of midazolam (34),<sup>19</sup> thiopental (89),<sup>20</sup> and diazepam (309).<sup>19</sup> Thiopental,

midazolam, and diazepam display an increase in  $V_{ss}$  in obese patients,<sup>21–23</sup> and this increase in  $V_{ss}$  remains significant even after correction for total body weight. However, although alprazolam volume of distribution in obese patients is greater than in control subjects, correction for total body weight results in no difference between the subjects groups.<sup>24</sup> Propofol, with a similar octanol:buffer partition ratio, behaves like alprazolam as far as distribution is concerned, although the octanol:buffer partition ratio is perhaps not the more relevant parameter to estimate *in vivo* lipid solubility.<sup>19</sup> The distribution volumes may be affected by numerous factors, including relative tissue affinity; therefore, phar-

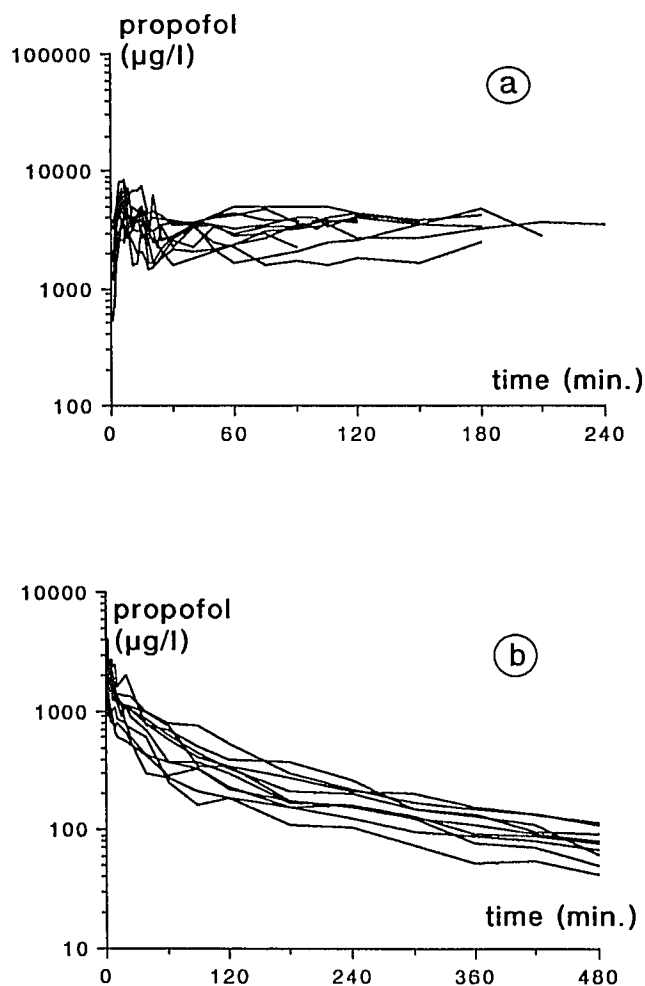

Fig. 2. Individual propofol blood concentration *versus* time data for each subject during the infusion (a) and after its discontinuation (b) in control patients. This figure used the raw data obtained for the pharmacokinetic study in healthy patients.<sup>5</sup>

Table 3. Pharmacokinetic Parameters

| Patients        | $T_{1/2} \alpha$<br>(min) | $T_{1/2} \beta$<br>(min) | $T_{1/2} \gamma$<br>(min) | V (L)           | $Cl_E$<br>( $ml \cdot min^{-1} \cdot kg^{-1}$ ) | $V_{ss}$<br>(L/kg) | $\Sigma Cl_i$<br>(L/min) |
|-----------------|---------------------------|--------------------------|---------------------------|-----------------|-------------------------------------------------|--------------------|--------------------------|
| <b>Obese</b>    |                           |                          |                           |                 |                                                 |                    |                          |
| 1               | 0.38                      | 20.1                     | 303                       | 2.80            | 21.8                                            | 2.31               | 2.68                     |
| 2               | 8.36                      | 53.0                     | 285                       | 86.96           | 34.0                                            | 2.65               | 1.95                     |
| 3               | 1.15                      | 18.4                     | 208                       | 7.17            | 25.6                                            | 1.55               | 1.64                     |
| 4               | 1.02                      | 21.6                     | 211                       | 4.17            | 14.0                                            | 0.98               | 1.01                     |
| 5               | 2.16                      | 48.0                     | 247                       | 9.11            | 20.2                                            | 1.52               | 3.12                     |
| 6               | 1.69                      | 23.7                     | 201                       | 10.96           | 30.4                                            | 1.71               | 1.23                     |
| 7               | 0.92                      | 25.3                     | 218                       | 5.9             | 25.6                                            | 1.23               | 1.69                     |
| 8               | 1.57                      | 22.6                     | 273                       | 16.3            | 22.9                                            | 2.72               | 4.12                     |
| Mean $\pm$ SD   | $2.16 \pm 2.6$            | $29.1 \pm 13.4$          | $243 \pm 39$              | $17.9 \pm 28.2$ | $24.3 \pm 6.2$                                  | $1.83 \pm 0.65$    | $2.18 \pm 1.05$          |
| Harmonic mean   |                           |                          |                           | 6.78            |                                                 |                    |                          |
| <b>Control*</b> |                           |                          |                           |                 |                                                 |                    |                          |
| 1               | 1.72                      | 20.9                     | 244                       | 25.2            | 29.8                                            | 3.07               | 5.52                     |
| 2               | 2.77                      | 19.1                     | 335                       | 22.8            | 34.0                                            | 3.62               | 2.55                     |
| 3               | 2.04                      | —                        | 130                       | 4.8             | 24.3                                            | 0.94               | 0.31                     |
| 4               | 0.85                      | 23.7                     | 284                       | 3.6             | 24.0                                            | 1.62               | 1.5                      |
| 5               | 1.53                      | 54.3                     | 526                       | 9.7             | 25.1                                            | 2.31               | 2.46                     |
| 6               | 2.80                      | 30.7                     | 214                       | 18.1            | 24.9                                            | 1.71               | 1.92                     |
| 7               | 1.20                      | 20.6                     | 197                       | 10.0            | 23.6                                            | 1.14               | 3.53                     |
| 8               | 1.73                      | 15.3                     | 184                       | 8.9             | 34.4                                            | 1.66               | 1.48                     |
| 9               | 2.18                      | 19.7                     | 156                       | 17.6            | 20.7                                            | 1.49               | 2.89                     |
| 10              | 1.24                      | 13.5                     | 186                       | 9.8             | 41.8                                            | 3.30               | 2.93                     |
| Mean $\pm$ SD   | $1.81 \pm 0.65$           | $24.2 \pm 12.3$          | $246 \pm 116$             | $13.04 \pm 7.4$ | $28.3 \pm 6.6$                                  | $2.09 \pm 0.94$    | $2.51 \pm 1.40$          |
| Harmonic mean   |                           |                          |                           | 9.10            |                                                 |                    |                          |
| P               | NS                        | NS                       | NS                        | NS              | NS                                              | NS                 | NS                       |

\* SIPHAR.

macologic agents demonstrate inconsistent changes as a result of their relative tissue affinities.

In normal-weight patients, propofol clearance is very high, and calculated values usually exceed hepatic blood flow estimated from physiologic values. Although evidence of extrahepatic mechanisms' involvement in

Table 4. Comparison of Pharmacokinetic Data Calculated with SIPHAR and ELSFIT Systems (control patients)

| Patients      | $Cl_E$ md<br>(SIPHAR)<br>(L/min) | $Cl_E$ md<br>(ELSFIT)<br>(L/min) | $V_{ss}$<br>(SIPHAR)<br>(L) | $V_{ss}$<br>(ELSFIT)<br>(L) |
|---------------|----------------------------------|----------------------------------|-----------------------------|-----------------------------|
| 1             | 1.79                             | 1.78                             | 184                         | 144                         |
| 2             | 1.87                             | 1.99                             | 199                         | 168                         |
| 3             | 1.31                             | 1.37                             | 51                          | 38                          |
| 4             | 1.32                             | 1.43                             | 89                          | 93                          |
| 5             | 1.76                             | 2.05                             | 162                         | 132                         |
| 6             | 2.12                             | 2.17                             | 145                         | 101                         |
| 7             | 1.65                             | 1.69                             | 80                          | 84                          |
| 8             | 2.10                             | 2.11                             | 101                         | 90                          |
| 9             | 1.99                             | 2.19                             | 143                         | 156                         |
| 10            | 2.09                             | 2.01                             | 165                         | 203                         |
| Mean $\pm$ SD | $1.80 \pm 0.30$                  | $1.88 \pm 0.30$                  | $132 \pm 49$                | $121 \pm 49$                |

Table 5. Concentration Coefficients and Constant Rates of the Pharmacokinetic Models for Every Patient

|                | A<br>(ng/L) | $\alpha$<br>( $min^{-1}$ ) | B<br>(ng/L) | $\beta$<br>( $min^{-1}$ ) | C<br>(ng/L) | $\gamma$<br>( $min^{-1}$ ) |
|----------------|-------------|----------------------------|-------------|---------------------------|-------------|----------------------------|
| <b>Obese</b>   |             |                            |             |                           |             |                            |
| 1              | 352         | 1.835                      | 4.8         | 0.0345                    | 0.2         | 0.0023                     |
| 2              | 11          | 0.083                      | 0.3         | 0.0131                    | 0.1         | 0.0024                     |
| 3              | 135         | 0.601                      | 4.0         | 0.0377                    | 0.2         | 0.0033                     |
| 4              | 237         | 0.683                      | 2.8         | 0.0322                    | 0.4         | 0.0033                     |
| 5              | 101         | 0.627                      | 8.7         | 0.0444                    | 0.4         | 0.0037                     |
| 6              | 90          | 0.411                      | 1.0         | 0.0292                    | 0.2         | 0.0035                     |
| 7              | 166         | 0.753                      | 3.4         | 0.0274                    | 0.1         | 0.0032                     |
| 8              | 57          | 0.441                      | 4.4         | 0.0306                    | 0.3         | 0.0025                     |
| <b>Control</b> |             |                            |             |                           |             |                            |
| 1              | 27          | 0.404                      | 11.9        | 0.0331                    | 0.4         | 0.0028                     |
| 2              | 33          | 0.250                      | 11          | 0.0363                    | 0.2         | 0.0021                     |
| 3              | 209         | 0.339                      |             |                           | 0.8         | 0.0053                     |
| 4              | 270         | 0.817                      | 8.4         | 0.0293                    | 0.3         | 0.0024                     |
| 5              | 106         | 0.400                      | 6.3         | 0.0454                    | 0.3         | 0.0038                     |
| 6              | 48          | 0.318                      | 7.8         | 0.0352                    | 0.6         | 0.0044                     |
| 7              | 92          | 0.559                      | 9.7         | 0.0513                    | 0.5         | 0.0037                     |
| 8              | 99          | 0.454                      | 3.3         | 0.0128                    | 0.1         | 0.0013                     |
| 9              | 51          | 0.245                      | 4.3         | 0.0226                    | 0.2         | 0.0032                     |
| 10             | 89          | 0.576                      | 10.6        | 0.0336                    | 0.5         | 0.0035                     |

The concentration coefficients have been normalized for a 1- $\mu$ g dose.

## PROPOFOL PHARMACOKINETICS IN OBESE PATIENTS

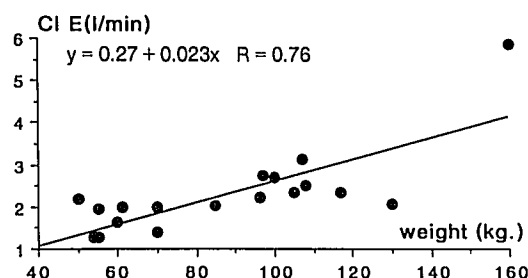

Fig. 3. Correlation between propofol clearance and body weight.

propofol total body clearance is increasing, the very high hepatic extraction of propofol has been confirmed by Lange *et al.*,<sup>25</sup> and the liver remains the main site of metabolism for propofol. As a consequence, propofol hepatic clearance is heavily dependent on hepatic blood flow. In obese patients, propofol clearance is correlated to body weight (fig. 3), and may reach very high values. Increases in blood volume, cardiac output, and splanchnic blood flow have been observed as a consequence of obesity.<sup>26</sup> However, direct evidence of an enhancement of hepatic blood flow is lacking in the obese population. No significant differences were observed in the systemic clearance of lidocaine, a highly extracted drug with a systemic clearance that closely parallels hepatic blood flow, when obese patients were compared to normal-weight patients.<sup>26</sup> Similarly, midazolam clearance after either intravenous or oral administration was not modified by obesity, and midazolam systemic availability remained constant.<sup>22</sup> These findings indicate that functional hepatic blood flow is not substantially modified in obese subjects. The liver of obese subjects is significantly larger than that of normal-weight subjects because of an increase in the number and size of parenchymal cells.<sup>27</sup> Nevertheless, obesity is associated with a number of pathologic conditions, mainly fatty infiltration of the liver, which may compromise hepatic function even when liver function tests are normal.<sup>28</sup> Propofol is primarily biotransformed *via* hepatic phase 2 conjugation pathways, its main metabolites being propofol glucuronide, 1 and 4 quinol glucuronides, and 4 quinol sulfate. Oxazepam

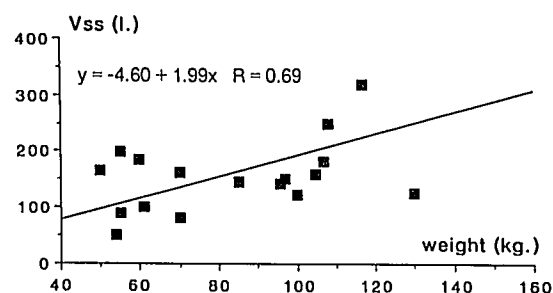

Fig. 4. Correlation between propofol Vss and body weight.

and lorazepam are two benzodiazepines primarily eliminated in the form of glucuronide. Their clearance was, respectively, 3.1 and 1.6 times greater in obese subjects than in control patients.<sup>29</sup> The influence of obesity on drug metabolism depends heavily on the metabolic pathway considered. It seems that drugs that undergo phase 1 metabolism are unaffected by obesity, as well as those that undergo acetylation, which is a phase 2 metabolic reaction. Most phase-2 reactions of glucuronidation and sulfation are enhanced.<sup>30</sup> Acetaminophen,<sup>31</sup> as well as propofol in this study, display a progressively increasing clearance with increasing body weight, which implies that conjugative drug metabolizing processes may, in some way, be related to body weight. The possible role of extrahepatic conjugation in this process remains to be discovered.

As a consequence of the simultaneous increase in the Vss and the clearance, propofol elimination half life was not prolonged in obese patients, and there were no signs of propofol accumulation in those subjects,

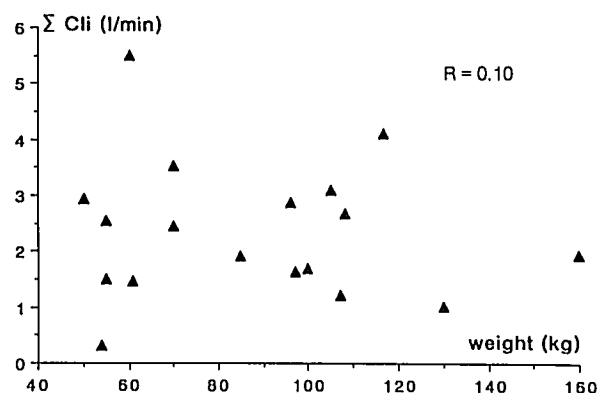

Fig. 5. Absence of correlation between propofol distribution clearance ( $\Sigma Cl_i$ ) and body weight.

<sup>22</sup> Alexander JK, Dennis EW, Smith WG, Amad KH, Duncan WC: Blood volume, cardiac output and distribution of systemic blood flow in extreme obesity. Cardiovasc Res Cent Bull 1: 39-44, 1962-63.

Table 6. Percent Coefficient of Each Half-life

| Patients       | Rapid Distribution Half-life | Slow Distribution Half-life | Terminal Elimination Half-life |
|----------------|------------------------------|-----------------------------|--------------------------------|
| <b>Obese</b>   |                              |                             |                                |
| 1              | 98.6                         | 1.3                         | 0.06                           |
| 2              | 96.5                         | 2.6                         | 0.87                           |
| 3              | 97                           | 2.9                         | 0.14                           |
| 4              | 98.7                         | 1.2                         | 0.17                           |
| 5              | 91.7                         | 7.9                         | 0.36                           |
| 6              | 98.6                         | 1.1                         | 0.22                           |
| 7              | 98                           | 2.0                         | 0.06                           |
| 8              | 92.3                         | 7.2                         | 0.49                           |
| Mean $\pm$ SD  | 96.4 $\pm$ 2.85              | 3.28 $\pm$ 2.72             | 0.30 $\pm$ 0.27                |
| <b>Control</b> |                              |                             |                                |
| 1              | 69.0                         | 30.0                        | 1.02                           |
| 2              | 74.5                         | 25.0                        | 4.5                            |
| 3              | 100                          |                             | 0.38                           |
| 4              | 97.0                         | 3.02                        | 0.11                           |
| 5              | 94.3                         | 5.6                         | 0.27                           |
| 6              | 85.2                         | 13.7                        | 1.06                           |
| 7              | 90.0                         | 9.6                         | 0.49                           |
| 8              | 96.2                         | 2.9                         | 0.10                           |
| 9              | 91.9                         | 7.8                         | 0.36                           |
| 10             | 88.9                         | 10.6                        | 0.50                           |
| Mean $\pm$ SD  | 88.7 $\pm$ 10.0              | 12.0 $\pm$ 9.5              | 0.88 $\pm$ 1.31                |

nor of any prolongation of the duration of action. Obese patients opened their eyes when blood propofol concentration reached  $1 \text{ mg} \cdot \text{l}^{-1}$ . This value of propofol concentration when opening eyes on verbal command has already been widely reported in other categories of patients.<sup>5,32,33</sup>

The empirical formula used for propofol dosage in this study provided adequate anesthetic levels, but was not supported by the present pharmacokinetic data. These pharmacokinetic data allow us to suggest that dosage of propofol for maintenance of anesthesia in obese subjects could, theoretically, be established on the same basis as in lean subjects, taking into account their actual body weight, with no specific risk of accumulation effects. However, the hemodynamic effects of larger doses of propofol remain to be assessed in obese patients.

## References

- Gelman S, Laws HL, Potzik J, Strong S, Smith L, Erdemir M: Thoracic epidural versus balanced anesthesia in morbid obesity: An intraoperative and post operative hemodynamic study. *Anesth Analg* 59: 902-908, 1980
- Kirby IJ, Howard EC: Propofol in a morbidly obese patient. *Anaesthesia* 42: 1125-1126, 1987
- Helmerts JH, Kraaijenhagen RJ, Van Leeuwen L, Zuurmon WWA: Propofol infusions in morbidly obese patients. *Anaesthesia* 43 (suppl): 120, 1988
- Servin F, Pommereau R, Leresche M, Grenon D, Desmonts JM: Use of propofol to induce and maintain general anaesthesia in morbidly obese patients. *Eur J Anaesth* 8: 323-324, 1991
- Servin F, Cockshott ID, Farinotti R, Haberer JP, Winckler C, Desmonts JM: Pharmacokinetics of propofol infusions in patients with cirrhosis. *Br J Anaesth* 65: 177-183, 1990
- Plummer G: An improved method for the determination of propofol using HPLC fluorescence. *J Chromatogr* 421: 171-176, 1987
- Colburn WA: Simultaneous pharmacokinetic and pharmacodynamic modeling. *J Pharmacokinet Biopharm* 12: 545-548, 1984
- Berman M, Shahn E, Weiss MF: The routine fitting of kinetic data to models: A mathematical formalism for digital computers. *Biophys J* 2: 275-287, 1962
- Rowland M, Tozer TN: Clinical Pharmacokinetics. Concepts and Applications. Philadelphia, Lea & Febiger, 1989, pp 297-322
- Lew EA: Mortality and weight: Insured lives and the American Cancer Society studies. *Ann Intern Med* 103: 1024-1029, 1985
- Peck CC, Beal SL, Sheiner LB, Nichols AL: Extended least squares non linear regression: A possible solution to the "choice of weights" problem in analysis of individual pharmacokinetic data. *J Pharmacokinet Biopharm* 12: 545-548, 1984
- Shafer SL, Stanski DL: Improving the clinical utility of anesthetic drug pharmacokinetics. *ANESTHESIOLOGY* 76: 327-330, 1992
- Redfern N, Stafford MA, Brooker J, Hull CJ: Incremental propofol for minor gynaecological procedures. *Postgrad Med J* 26: 187-190, 1985
- Gepts E, Camu F, Cockshott ID, Douglas EJ: Disposition of propofol administered as constant rate intravenous infusions in humans. *Anesth Analg* 66: 1256-1263, 1987
- Campbell GA, Morgan DJ, Kumar K, Crankshaw DP: Extended blood collection period required to define distribution and elimination kinetics of propofol. *Br J Clin Pharmacol* 26: 187-190, 1988
- Albanese J, Martin C, Lacarelle B, Saux P, Durand A, Gouin F: Pharmacokinetics of long-term propofol infusion used for sedation in ICU patients. *ANESTHESIOLOGY* 73: 214-218, 1990
- Hughes MA, Glass PSA, Jacobs JR: Context-sensitive half time in multicompartment pharmacokinetic models for intravenous anesthetic drugs. *ANESTHESIOLOGY* 76: 334-341, 1992
- Blouin RA, Kolpek JH, Mann HJ: Influence of obesity on drug disposition. *Clin Pharm* 6: 706-714, 1987
- Greenblatt DJ, Arendt RM, Abernethy DR, Giles HFG, Sellers EM, Shader RI: In vitro quantitation of benzodiazepines lipophilicity: Relation to in vivo distribution. *Br J Anaesth* 55: 985-989, 1983
- Brand L, Mark LC, Snell M, Vrindten P, Dayton PG: Physiologic disposition of methohexital in man. *ANESTHESIOLOGY* 24: 331-335, 1963
- Jung D, Mayersohn M, Perrier D, Calkins J, Saunders R: Thiopental disposition in lean and obese patients undergoing surgery. *ANESTHESIOLOGY* 56: 269-274, 1982
- Greenblatt DJ, Abernethy DR, Locniskar A, Harmatz JS, Limjuco RA, Shader RI: Effect of age, gender and obesity on midazolam kinetics. *ANESTHESIOLOGY* 61: 27-35, 1984
- Abernethy DR, Greenblatt DJ, Divoll M, Harmatz JS, Shader RI: Alteration in drug disposition and clearance due to obesity. *J Pharmacol Exp Ther* 217: 681-685, 1981



# PROPOFOL PHARMACOKINETICS IN OBESE PATIENTS

24. Abernethy DR, Greenblatt DJ, Divoll M, Smith RB, Shader RI: The influence of obesity on the pharmacokinetics of oral alprazolam and triazolam. *Clin Pharmacokinet* 9: 177-183, 1984
25. Lange H, Stephan H, Rieke H, Kellerman M, Sonntag H, Bircher J: Hepatic and extrahepatic disposition of propofol in patients undergoing coronary bypass surgery. *Br J Anaesth* 64: 563-570, 1990
26. Abernethy DR, Greenblatt DJ: Lidocaine disposition in obesity. *Am J Cardiol* 53: 1183-1186, 1984
27. Naeye RL, Rood EP: The size and number of cells in visceral organs in human obesity. *Am J Clin Pathol* 54: 215-253, 1970
28. Adler M, Schaffner F: Fatty liver hepatitis and cirrhosis in obese patients. *Am J Med* 67: 811-816, 1979
29. Abernethy DR, Greenblatt DJ, Divoll M, Shader RI: Enhanced glucuronide conjugation of drugs in obesity: Studies of lorazepam, oxazepam and acetaminophen. *J Lab Clin Med* 101: 873-880, 1983
30. O'Connor P, Feely J: Clinical pharmacokinetics and endocrine disorders. Therapeutic implications. *Clin Pharmacokinet* 13: 345-364, 1987
31. Abernethy DR, Divoll M, Greenblatt DJ, Ameer B: Obesity, sex and acetaminophen disposition. *Clin Pharmacol Ther* 31: 783-790, 1982
32. Shafer A, Doze VA, Shafer SL, White PF: Pharmacokinetics and pharmacodynamics of propofol infusions during general anesthesia. *ANESTHESIOLOGY* 69: 348-356, 1988
33. Cummings GL, Dixon J, Kay NH, Windsor JPW, Major E, Morgan M, Sear JW, Spence AA, Stephenson DK: Dose requirements of ICI 35868 (Propofol, Diprivan) in a new formulation for induction of anaesthesia. *Anaesthesia* 39: 1168-1171, 1984
